# Supplementary material for: Rhinochelys amaberti Moret (1935), a protostegid turtle from the Early Cretaceous of France
Source: PeerJ. 2018 Apr 10;6:e4594. doi: 10.7717/peerj.4594 (PMC5898427; doi:10.7717/peerj.4594)
Supplement: Supplemental Information 2 — Mean cladogenesis rate and standard deviation using all most parsimonious trees arising from the analyse of the chelonioid dataset using an equal optimization of branch lengths [file peerj-06-4594-s008.csv]

	mean	median	med.low	med.high	mean-stdev	mean+stdev
Hol	0	0	0	0	0	0
U_Pli	0	0	0	0	0	0
M_Pli	0	0	0	0	0	0
Cala	0	0	0	0	0	0
Gel	0	0	0	0	0	0
Pia	0	0	0	0	0	0
Zan	0	0	0	0	0	0
Mes	0	0	0	0	0	0
Tor	0	0	0	0	0	0
Ser	0	0	0	0	0	0
Lan	0.0952380952380952	0	0	0	-0.201863661948079	0.39233985242427
Bur	0	0	0	0	0	0
Aqu	0.285714285714286	0	0	0	-0.171515671144927	0.742944242573498
Cha	0	0	0	0	0	0
Rup	0.80952380952381	1	1	1	0.412087191592172	1.20696042745545
Pri	0.19047619047619	0	0	0	-0.206960427455447	0.587912808407828
Bart	0.0952380952380952	0	0	0	-0.201863661948079	0.39233985242427
Lut	0	0	0	0	0	0
Ypr	0.666666666666667	1	1	1	0.189547943052969	1.14378539028036
Tha	0	0	0	0	0	0
Sel	0.476190476190476	0	0	0	-0.0292962604136553	0.981677212794608
Dan	0.333333333333333	0	0	0	-0.143785390280365	0.810452056947031
Maa	0.642857142857143	0	0	0	-0.178249444544617	1.4639637302589
Cam	4.64285714285714	4	3	5	3.11552200830402	6.17019227741027
San	1.23809523809524	1	1	1	0.807014700686196	1.66917577550428
Con	1.21428571428571	1	0	2	0.401710335847136	2.02686109272429
Tur	3.38095238095238	3	3	3	2.88944494596006	3.8724598159447
Cen	2.52380952380952	3	2	4	1.4364521266418	3.61116692097725
U_Alb	1.47619047619048	1	1	1	0.970703739586345	1.98167721279461
M_Alb	1.38095238095238	1	0	2	0.720118430650006	2.04178633125476
L_Alb	1.30952380952381	1	1	1	0.705145667593056	1.91390195145456
U_Apt	5.73809523809524	6	5	7	4.52717895915151	6.94901151703896
L_Apt	3.23809523809524	3	3	3	2.8070147006862	3.66917577550428
Bar	1.07142857142857	1	1	1	0.810767391213565	1.33208975164358
Hau	3.66666666666667	4	4	4	3.18954794305297	4.14378539028036
Val	4.76190476190476	5	5	5	4.33082422449572	5.1929852993138
Ber	3.76190476190476	4	4	4	3.33082422449572	4.1929852993138
Tit	4	4	4	4	4	4
Kim	0	0	0	0	0	0
Oxf	0	0	0	0	0	0
Cal	0	0	0	0	0	0
Bat	0	0	0	0	0	0
Baj	0	0	0	0	0	0
Aal	0	0	0	0	0	0
Toa	0	0	0	0	0	0
Pli	0	0	0	0	0	0
Sin	0	0	0	0	0	0
Het	0	0	0	0	0	0
Rhe	0	0	0	0	0	0
U_Nor	0	0	0	0	0	0
M_Nor	0	0	0	0	0	0
L_Nor	0	0	0	0	0	0
Car	0	0	0	0	0	0
Lad	0	0	0	0	0	0
Ani	0	0	0	0	0	0
Ole	0	0	0	0	0	0
Ind	0	0	0	0	0	0
