# Supplementary material for: Rhinochelys amaberti Moret (1935), a protostegid turtle from the Early Cretaceous of France
Source: PeerJ. 2018 Apr 10;6:e4594. doi: 10.7717/peerj.4594 (PMC5898427; doi:10.7717/peerj.4594)
Supplement: Supplemental Information 3 — Mean cladogenesis rate and standard deviation using all most parsimonious trees arising from the analyse of the Bardet dataset using an equal optimization of branch lengths [file peerj-06-4594-s009.csv]

	mean	median	med.low	med.high	mean-stdev	mean+stdev
Hol	0	0	0	0	0	0
U_Pli	0	0	0	0	0	0
M_Pli	0	0	0	0	0	0
Cala	0	0	0	0	0	0
Gel	0	0	0	0	0	0
Pia	0	0	0	0	0	0
Zan	0	0	0	0	0	0
Mes	0	0	0	0	0	0
Tor	0	0	0	0	0	0
Ser	0	0	0	0	0	0
Lan	0	0	0	0	0	0
Bur	0	0	0	0	0	0
Aqu	0	0	0	0	0	0
Cha	0	0	0	0	0	0
Rup	0	0	0	0	0	0
Pri	0	0	0	0	0	0
Bart	0	0	0	0	0	0
Lut	0	0	0	0	0	0
Ypr	0	0	0	0	0	0
Tha	0	0	0	0	0	0
Sel	0	0	0	0	0	0
Dan	0	0	0	0	0	0
Maa	0	0	0	0	0	0
Cam	1	1	1	1	1	1
San	0	0	0	0	0	0
Con	0	0	0	0	0	0
Tur	0	0	0	0	0	0
Cen	0.333333333333333	0	0	0	-0.147051128081928	0.813717794748595
U_Alb	1.66666666666667	2	2	2	1.18628220525141	2.14705112808193
M_Alb	1	1	1	1	1	1
L_Alb	3	3	3	3	3	3
U_Apt	1.40740740740741	1	1	1	0.906695663274867	1.90811915153995
L_Apt	1.18518518518519	1	1	1	0.789337794521616	1.58103257584875
Bar	0	0	0	0	0	0
Hau	3.22222222222222	3	3	3	2.79856294935406	3.64588149509038
Val	7.51851851851852	8	8	8	6.76555665563862	8.27148038139842
Ber	1.66666666666667	2	2	2	1.18628220525141	2.14705112808193
Tit	0	0	0	0	0	0
Kim	1	1	1	1	1	1
Oxf	3	3	3	3	3	3
Cal	0	0	0	0	0	0
Bat	0	0	0	0	0	0
Baj	0	0	0	0	0	0
Aal	0	0	0	0	0	0
Toa	0	0	0	0	0	0
Pli	0	0	0	0	0	0
Sin	0	0	0	0	0	0
Het	0	0	0	0	0	0
Rhe	0	0	0	0	0	0
U_Nor	0	0	0	0	0	0
M_Nor	0	0	0	0	0	0
L_Nor	0	0	0	0	0	0
Car	0	0	0	0	0	0
Lad	0	0	0	0	0	0
Ani	0	0	0	0	0	0
Ole	0	0	0	0	0	0
Ind	0	0	0	0	0	0
